# Supplementary material
Source: Springer Nature journal article supplement (https://www.springermedizin.de/resource/supplementary/12958_2005_275_MOESM3_ESM.pdf/9567534)

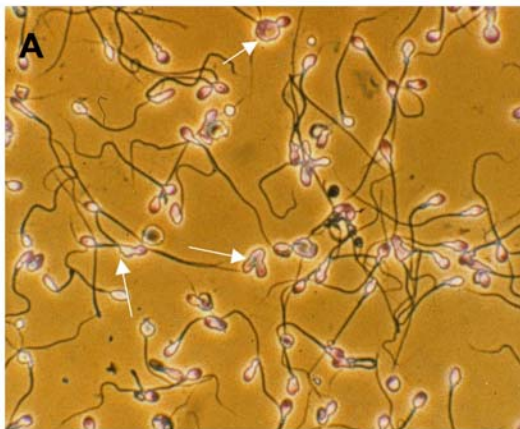

**B**

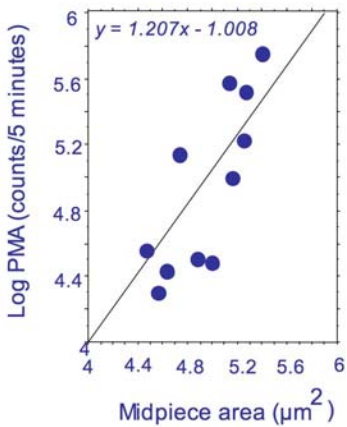

Supplement: MOESM3 [file 9567534]
